# Supplementary figures and images for: Experimental and numerical investigation of microdialysis probes for ethanol metabolism studies
Source: Royal Society of Chemistry journal article supplement (doi:10.1039/d4ay00699b), 2024-01-01

(a)

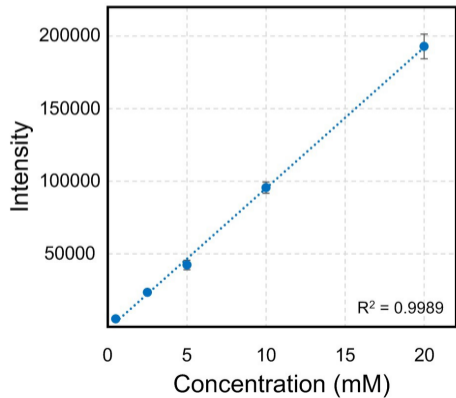

(b)

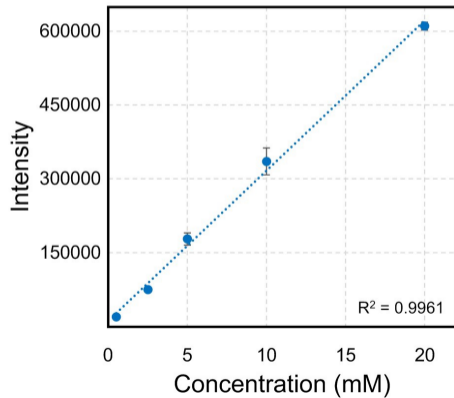

Supplement: d4ay00699b2.pdf [file d4ay00699b2.pdf]
